## **Bupropion inhibits serotonin type 3AB heteromeric channels at a physiologically relevant concentration**

Antonia G. Stuebler<sup>1</sup>, Michaela Jansen<sup>1,\*</sup>

<sup>1</sup>Department of Cell Physiology and Molecular Biophysics and Center for Membrane Protein Research, School of Medicine, Texas Tech University Health Sciences Center, Lubbock 79430, Texas, USA.

\*Corresponding author: Michaela Jansen, Pharm.D., Ph.D., Department of Cell Physiology and Molecular Biophysics, Center for Membrane Protein Research, School of Medicine, Texas Tech University Health Sciences Center, 3601 4th St., Lubbock, TX 79430. Tel: +1 806-743-4059; Fax: +1 806-743-1512; Email: [michaela.jansen@ttuhsc.edu](mailto:michaela.jansen@ttuhsc.edu)

### **Abstract**

Bupropion, a FDA-approved antidepressant and smoking cessation aid, blocks dopamine and norepinephrine reuptake transporters and non-competitively inhibits nicotinic acetylcholine (nACh) and serotonin type 3A (5-HT<sub>3</sub>) receptors. 5-HT<sub>3</sub> receptors are pentameric ligand-gated ion channels that regulate synaptic activity in the central and peripheral nervous system pre- and postsynaptically. In the present study, we examined and compared the effect of bupropion and its active metabolite hydroxybupropion on homomeric 5-HT<sub>3A</sub> and heteromeric mouse 5-HT<sub>3AB</sub> receptors expressed in *Xenopus laevis* oocytes using two-electrode voltage clamp experiments. Co-application of bupropion or hydroxybupropion with 5-HT dose-dependently inhibited 5-HT-induced currents in 5-HT<sub>3AB</sub>Rs (IC<sub>50</sub> = 866 μM and 505 μM, respectively) but potentiated 5-HT-induced currents at low (30-50 μM) concentrations. The corresponding IC<sub>50</sub>s for bupropion and hydroxybupropion with 5-HT<sub>3A</sub>R were 10- and 5-fold lower, respectively (87 μM and 113 μM), and no potentiation was observed. The inhibition of 5-HT<sub>3A</sub>R and 5-HT<sub>3AB</sub>R was non-use dependent and voltage-independent, indicating bupropion is not an open channel blocker. The inhibition by bupropion was reversible and time-dependent. Of note, pre-incubation with a low concentration of bupropion that mimics therapeutic drug conditions significantly inhibited 5-HT induced currents in 5-HT<sub>3A</sub> and even more so 5-HT<sub>3AB</sub> receptors. In summary, our results indicate that bupropion inhibits 5-HT<sub>3AB</sub>R, as well as homomeric receptors, and that this inhibition takes place at clinically-relevant concentrations. Inhibition of 5-HT<sub>3</sub> receptors by bupropion may contribute to its desired and/or undesired clinical effects.

### **Significance Statement**

5-HT<sub>3AB</sub> receptors are found in brain areas involved in mood regulation. Clinical studies indicate that antagonizing these receptors was successful in treating mood and anxiety disorders. Some currently clinically available antidepressants and antipsychotics act as antagonists of 5-HT<sub>3</sub> receptors. Previously, bupropion was shown to be an antagonist at homopentameric 5-HT<sub>3A</sub> receptors. The present work provides novel insights into the pharmacological effects bupropion exerts on heteromeric 5-HT<sub>3AB</sub> receptors. The results advance the knowledge on the clinical effect of bupropion as an antidepressant.

## **Introduction**

The 5-hydroxytryptamine-3 (5-HT<sub>3</sub>) receptor is an ionotropic receptor and a member of the Cys-loop family of pentameric ligand-gated ion channels (pLGICs) and thereby differs from G-protein-coupled serotonin receptors (5-HT<sub>1</sub> to 5-HT<sub>7</sub>) (Hannon, 2008; Hoyer, 2002; Thompson, 2007). 5-HT<sub>3R</sub> is similar in structure and function to the other members of the pLGICs, including the cation-selective nicotinic acetylcholine receptor (nAChR) and the anion-selective  $\gamma$ -amino butyric acid (GABA<sub>A</sub>) and glycine receptors. Malfunction in these receptors has been linked to several neurological disorders (Hogg, 2003; Lemoine, 2012). Together, they are responsible for fast neurotransmission in the central and peripheral nervous system (Thompson, 2013) and are involved in virtually all brain functions (Hassaine, 2014).

To date, five different 5-HT<sub>3</sub> subunits have been identified (5-HT<sub>3A</sub> – 5-HT<sub>3E</sub>). The first subunit to be cloned, 5-HT<sub>3A</sub> (Maricq, 1991), is the only subunit that can form functional homo-oligomeric receptors on the cell membrane when expressed in *Xenopus* oocytes or cell lines (Hussy, 1994). Introduction of the 5-HT<sub>3B</sub> subunit, to form functional heteromers, altered the properties of the homo-oligomer that more closely resembled the functional responses observed in native tissues (Davies, 1999; Dubin, 1999; Hussy, 1994; Maricq, 1991). When compared to 5-HT<sub>3AR</sub>, 5-HT<sub>3ABR</sub> differs in agonist

concentration-response curves, shows increased single-channel conductance and desensitization, and an altered current-voltage relationship (Davies, 1999; Dubin, 1999; Kelley, 2003b; Thompson, 2013).

The 5-HT<sub>3</sub>R is widely distributed in the central and peripheral nervous systems, and on extraneuronal cells, such as monocytes, chondrocytes, T-cells, and synovial tissue (Fiebich, 2004). In the periphery, 5-HT<sub>3</sub>Rs are found in the autonomic, sensory and enteric nervous systems (Faerber, 2007) where they are involved in regulating gastrointestinal (GI) functions, such as motility, emesis, visceral perception and secretion (Karnovsky, 2003; Lummis, 2012; Niesler, 2011; Niesler, 2003; Niesler, 2007). The highest density of 5-HT<sub>3</sub>Rs in the CNS is in the hindbrain, particularly the dorsal vagal complex involved in the vomiting reflex, and in limbic structures, notably the amygdala, hippocampus, nucleus accumbens and striatum (Barnes, 1989; Hannon, 2008; Jones, 1992; Miyake, 1995). Significant 5-HT<sub>3B</sub> expression was identified in the human brain with high levels in the amygdala, hippocampus, and the nucleus caudate (Davies, 1999; Dubin, 1999; Niesler, 2003; Tzvetkov, 2007). A high amount of 5-HT<sub>3</sub> is found on pre-synaptic nerve fibers (Miquel, 2002; Nayak, 2000), through which it can modulate the release of other neurotransmitters, such as dopamine, cholecystokinin, GABA, substance P and acetylcholine (Chameau, 2006; Faerber, 2007). Owing to its involvement in many brain functions, the 5-HT<sub>3</sub>R represents an attractive therapeutic target.

5-HT<sub>3</sub>R antagonists are used to effectively treat patients experiencing irritable bowel syndrome and chemotherapy- /radiotherapy-induced and postoperative nausea and vomiting (Thompson, 2007). Some antidepressants (Choi, 2003; Eisensamer, 2003)

and antipsychotic drugs (Rammes, 2004) also antagonize 5-HT<sub>3</sub>R, which, together with other preclinical and clinical studies, suggest the relevance of 5-HT<sub>3</sub>R antagonism for treating psychiatric disorders (Bétry, 2011). We recently discovered that bupropion, another antidepressant, antagonizes 5-HT<sub>3A</sub>R (Pandhare, 2017).

Bupropion was first approved as an 'atypical' antidepressant over 30 years ago, and today is one of the most commonly prescribed antidepressants. Despite its recognized clinical efficacy for both depression and smoking cessation, a comprehensive picture of how bupropion modulates neurotransmission is still emerging. Bupropion's therapeutic effect is thought to be mediated by the blocked reuptake of dopamine (DA) and norepinephrine (NE) (Stahl, 2004) and the non-competitive inhibition of neuronal and muscular AChRs (Alkondon, 2005; Arias, 2009b; Fryer, 1999; Slemmer, 2000). Most recently, the discovery that bupropion also non-competitively inhibits 5-HT<sub>3A</sub>R (Pandhare, 2017) raises the question of whether this inhibition takes place at physiologically relevant concentrations and if bupropion inhibits the heteromeric members of the 5-HT<sub>3</sub> family. Therefore, we investigated the effect of bupropion and its major metabolite, hydroxybupropion, on the function of heteromeric 5-HT<sub>3AB</sub>Rs as compared to the homomeric receptor in *Xenopus* oocytes. Here, we demonstrate that 5-HT<sub>3AB</sub>R, like 5-HT<sub>3A</sub>R, is dose-dependently inhibited by bupropion and its metabolite. This inhibition is voltage-independent, non-use dependent (i.e. affected by pre-incubation), and occurs significantly at physiologically relevant concentrations.

## **Materials and Methods**

## Materials

Protease inhibitor cocktail III (Research Products International, Mt. Prospect, IL); bupropion hydro-chloride and hydroxybupropion (Toronto Research Chemicals, Inc. North York, Canada); serotonin (5-HT; serotonin creatinine sulfate monohydrate) from Acros Organics (New Jersey, NJ). Stock of serotonin (2 mM) and bupropion (100 mM) were prepared in distilled water. Hydroxybupropion (100 mM) was dissolved in dimethyl sulfoxide (DMSO). All solutions were made in OR-2 buffer immediately before conducting experiments.

## Molecular Biology

Complementary DNA encoding the mouse 5-HT<sub>3A</sub>R, containing a V5-tag (GKPIPPLLGLDSTQ) close to the N-terminus (Jansen, 2008), and 5-HT<sub>3AB</sub>R in the pGEMHE vector were used for oocyte expression (Reeves, 2001). Plasmids were linearized with the *NheI* restriction enzyme and *in vitro* transcribed with the T7 RNA polymerase kit (mMESSAGE mMACHINE<sup>®</sup> T7 Kit; Applied Biosystems/Ambion, Austin, TX). Capped cRNA was purified with the MEGAclean<sup>™</sup> Kit (Applied Biosystems/Ambion, Austin, TX), and precipitated using 5 M ammonium acetate. cRNA dissolved in nuclease-free water was stored at -80 °C.

## *Xenopus laevis* oocyte preparation

Oocytes were isolated, enzymatically defolliculated, and stored as previously described (Goyal, 2011). *Xenopus laevis* frogs were handled and maintained following procedures approved by the local animal welfare committee (Institutional Animal Care and Use Committee, IACUC #: 08014, PHS Assurance # A 3056-01). In brief, the isolated oocytes were incubated with collagenase (Collagenase from *Clostridium histolyticum* Type IA, Sigma-Aldrich) for one hour in OR-2 (115 mM NaCl, 2.5 mM KCl, 1.8 mM MgCl<sub>2</sub>, 10 mM HEPES, pH 7.5), followed by extensive washing with OR-2. Oocytes were then rinsed three times with OR-2 + 2 mM Ca<sup>2+</sup> for 45min each and maintained in standard oocyte saline medium (SOS: 100 mM NaCl, 2 mM KCl, 1 mM MgCl<sub>2</sub>, 1.8 mM CaCl<sub>2</sub>, 5 mM HEPES, pH 7.5, supplemented with 1% antibiotic-antimycotic, 5% horse serum) for up to 7 days at 16 °C. Oocytes were microinjected with 10 ng of *in vitro* synthesized mRNA (0.2 ng/μL) using an automatic oocyte injector (Nanoject II™; Drummond Scientific Co., Broomall, PA) up to 48 hours after isolation. For optimal expression of the heteromeric 5-HT<sub>3AB</sub>R, the A and B subunits were co-injected in a 1:3 ratio. This ratio has proven to be optimal for 5-HT<sub>3AB</sub>R expression, as a lower ratio results in 5-HT<sub>3A</sub>R mimicked current response and higher ratio would impact overall receptor expression (Corradi, 2015; Thompson, 2013).

## **Electrophysiology**

Two-electrode voltage clamp recordings were performed and analyzed using a TEV-200A amplifier (Dagan Instruments, Minneapolis, MN), a Digidata 1440A data interface (Molecular Devices, Sunnyvale, CA), MiniDigi 1B (Molecular Devices) and pClamp 10.7 software (Molecular Devices). Recordings were conducted 1 – 4 days after microinjection. All experiments were performed at room temperature (RT, 22–24°C) and

at a holding potential of -60 mV, unless otherwise stated. The oocytes were held in a 250  $\mu$ L chamber and perfused with base solutions (OR-2) using gravity flow at an approximate rate of 5mL/min. Drugs and serotonin were dissolved in the same solution and applied by gravity perfusion. All solutions were applied to a single oocyte until currents reached a steady state before switching solutions. The glass microelectrodes were filled with 3 M KCl and had a resistance of below 2 M $\Omega$ . Agonists/antagonists were applied until stable response or desensitization was observed to record maximal current response.

### **Oocyte membrane preparation**

Oocytes expressing 5-HT<sub>3A</sub>R and 5-HT<sub>3AB</sub>R were homogenized and the membranes were isolated as described before (Pandhare, 2017). The oocytes were homogenized with a 0.5 mL pestle in ice-cold vesicle dialysis buffer (VDB: 100  $\mu$ L/oocyte: 96 mM NaCl, 0.1 mM EDTA, 10 mM MOPS, 0.02% NaN<sub>3</sub>, pH 7.5), supplemented with protease inhibitor cocktail III [2  $\mu$ L/mL] and centrifuged (800 g for 10 min at 4 °C). The supernatant was collected and the membranes containing the receptors were obtained by high-speed centrifugation (39,000g for 1 h at 4 °C). Membranes were resuspended in VDB (3  $\mu$ L/ oocyte) containing PI cocktail and stored at -80 °C.

### **Western Blotting**

For SDS-electrophoresis, 3  $\mu$ L of the resuspended membrane pellets containing the receptors were run alongside membrane pellet of uninjected oocyte on 4–15% precast gradient TGX Stain-Free™ gels (Bio-Rad Laboratories) for 34 min at 200 V. Proteins were transferred to PVDF membrane using the Trans-Blot Turbo Transfer System (Bio-

Rad). The membranes were blocked with 5% blotting-grade blocker (Bio-Rad) in Tris-buffered Saline with Tween (TTBS) (100  $\mu$ M Tris pH 7.5, 0.9% NaCl, 1% Tween-20) [25 – 30 mL/membrane]) for one hour up to overnight. The membranes were incubated with the primary V5 HRP-conjugated antibody (1:5,000, V5-HRP antibody, invitrogen) in TTBS (5% blotting-grade blocker) for one hour at RT. After the removal of the primary antibody, the membranes were washed 4x for 5min each with TTBS and one 5-min wash with TBS. Proteins were visualized by chemiluminescent detection (Image Quant) of peroxidase substrate activity (SuperSignal West Femto Maximum Sensitivity Substrate, Thermo Scientific).

## Data Analysis

All electrophysiological data was analyzed with pClamp, Origin (OriginLab Corporation; Northampton, MA) and Prism 6 Software (GraphPad Prism®; La Jolla, CA). Data is represented as the mean  $\pm$  S.E.M, maximal current induced by 5-HT was used as the normalizing standard (100% current response) for other current responses in the same oocyte. Statistical significance was determined with paired or unpaired t-test (in Origin) with a cutoff for significance of 0.05 (\* $p \leq 0.05$  \*\* $p \leq 0.01$  \*\*\* $p \leq 0.001$ ). The 5-HT (agonist stimulation – 1a), bupropion, or hydroxybupropion (antagonist inhibition – 1b) concentration dependence on 5-HT<sub>3</sub> currents was fitted using the variable-slope sigmoidal dose response curve equations:

$$\frac{I}{I_{\max}} * 100 = \frac{1}{1+10^{(\text{LogEC}_{50}-X)*nH}} \quad (1a)$$

$$\frac{I}{I_{\max}} * 100 = \frac{1}{1+10^{(\text{LogIC}_{50}-X)*nH}} \quad (1b)$$



Where  $I_{max}$  is the current activated at saturating 5-HT concentration,  $EC_{50}$  is the agonist concentration producing 50% of the maximal  $I_{max}$ ,  $IC_{50}$  is the concentration of antagonist producing 50% inhibition of  $I_{max}$ ,  $X$  is the agonist (1a) or antagonist (1b) concentration, and  $n_H$  is the Hill coefficient. All figures and graphs were made in Origin and Adobe Illustrator CC 2018.

## **Results**

### **Differentiating between 5-HT<sub>3A</sub>R and 5-HT<sub>3AB</sub>R**

To evaluate the effect of bupropion and its major metabolite hydroxybupropion (Fig 1) on homomeric and heteromeric 5-HT<sub>3</sub> receptors, we expressed the mouse 5-HT<sub>3A</sub>R and 5-HT<sub>3AB</sub>R (in a 1:3 A to B ratio (Corradi, 2015; Thompson, 2013)) in *Xenopus* oocytes. First, we substantiated the obvious difference between the two receptor types (Fig 1). The application of the agonist serotonin (5-HT) to *Xenopus* oocytes expressing 5-HT<sub>3A</sub>R (Fig 1A, top trace) or 5-HT<sub>3AB</sub>R (Fig 1A, bottom trace) elicits a rapid inward current with a concentration-dependent amplitude. The currents resulting from a range of 5-HT-concentrations were used to calculate the concentrations that produce a half-maximal response (Fig 1B), yielding  $EC_{50}$  values of 0.80  $\mu$ M ( $n = 5$ , Hill slope [ $n_H$ ] of  $2.53 \pm 0.26$ ) for 5-HT<sub>3A</sub>R and 4.30  $\mu$ M ( $n = 8$ ;  $n_H = 1.04 \pm 0.02$ ) for 5-HT<sub>3AB</sub>R (Table 1). Our  $EC_{50}$  value for mouse 5-HT<sub>3A</sub>R and 5-HT<sub>3AB</sub>R are comparable to other values reported previously (Hanna, 2000; Hayrapetyan, 2005; Jansen, 2008; Lochner, 2010; Thompson, 2008). In rodents, the difference between  $EC_{50}$  values for 5-HT<sub>3A</sub> and 5-HT<sub>3AB</sub> receptors are smaller as compared to the human subunits, nonetheless, the heteromeric receptor

shows fast characteristic desensitization kinetics (Fig 1C) and a right-shift in potency (Fig 1B).

### **Effect of Bupropion on 5-HT<sub>3A</sub>R and 5-HT<sub>3AB</sub>R**

5-HT and a wide range of bupropion concentrations (A: 10 – 1000  $\mu$ M; AB: 30 – 4000  $\mu$ M) were co-applied to *Xenopus* oocytes expressing homomeric 5-HT<sub>3A</sub>R (Fig 2A, top) or heteromeric 5-HT<sub>3AB</sub>R (Fig 2A, bottom) under two-electrode voltage clamp. 5-HT was applied at a concentration that elicits approximately 30% of the maximal response (EC<sub>30</sub>, 5-HT<sub>3A</sub>R: 0.5  $\mu$ M, 5-HT<sub>3AB</sub>R: 2  $\mu$ M). Both traces in Fig. 2A show representative current responses at -60 mV. The first inward current represents the control current evoked by 5-HT alone, followed by subsequent currents obtained by the co-application of 5-HT (EC<sub>30</sub>) and increasing concentrations of bupropion, which dose-dependently inhibited 5-HT-induced currents for 5-HT<sub>3A</sub> and 5-HT<sub>3AB</sub> receptors. The concentrations inhibiting 50% of the control currents (IC<sub>50</sub>) were 87.1  $\mu$ M ( $n_H=1.28\pm0.07$ ,  $n=5$ ) and 866  $\mu$ M ( $n_H=2.07\pm0.20$ ,  $n=7$ ) for A and AB respectively (Fig. 2B; Table 1). Bupropion's potency at 5-HT<sub>3AB</sub>R was 10-fold lower when compared to 5-HT<sub>3A</sub>R (unpaired  $t$ ,  $t(10)=9.49$ ,  $p=0.0000784$ ). Notably, small potentiation of 5-HT-evoked currents was observed at low concentrations of bupropion (Fig. 2A bottom bar graph, 30  $\mu$ M bupropion led to a 22.6% increase in current), and was therefore excluded from the IC<sub>50</sub> fitting and analysis. Bupropion alone did not elicit an inward current for either receptor (Fig 2C).

### **Effect of Hydroxybupropion on 5-HT<sub>3A</sub>R and 5-HT<sub>3AB</sub>R**

Hydroxybupropion, a major metabolite of bupropion, is involved in bupropion's therapeutic effect, as it also inhibits DA/NE transporters, nAChRs, and 5-HT<sub>3A</sub>R (Bondarev, 2003; Damaj, 2004; Pandhare, 2017). Similar to bupropion, hydroxybupropion inhibited 5-HT<sub>3A</sub>R and 5-HT<sub>3AB</sub>R dose-dependently when co-applied with 5-HT (Fig 3A). The hydroxybupropion concentrations reducing the 5-HT-evoked currents to 50% of the initial response were 113  $\mu$ M (n=5,  $n_H=1.17\pm0.06$ ) for 5-HT<sub>3A</sub>R and 505  $\mu$ M (n=8,  $n_H=1.57\pm0.12$ ) for 5-HT<sub>3AB</sub>R (Fig. 3B; Table 1). Similar to bupropion, the potency of hydroxybupropion for 5-HT<sub>3AB</sub>R was right-shifted, resulting in a higher IC<sub>50</sub> value when compared to 5-HT<sub>3A</sub>R, although to a lesser extent than bupropion (unpaired t,  $t(9)=16.26$ ,  $p=0.000000185$ ). Interestingly, low (50  $\mu$ M) hydroxybupropion concentrations also led to small potentiation of 5-HT<sub>3AB</sub>R currents, which therefore were excluded from IC<sub>50</sub> fitting and evaluations (Fig. 3A bar graph, average of 9.94% increase from initial current with 50  $\mu$ M hydroxybupropion). Hydroxybupropion did not elicit a response in 5-HT<sub>3A</sub> or 5-HT<sub>3AB</sub> expressing oocytes when applied alone (Fig 3C).

### **Effect of Pre-incubation with Bupropion and Hydroxybupropion on 5-HT<sub>3A</sub> and 5-HT<sub>3AB</sub> Receptors**

Bupropion's allosteric inhibition of 5-HT<sub>3A</sub>R is not dependent on the opening of the receptor's channel; it is non-use dependent (Pandhare, 2017). To evaluate the extent of inhibition evoked by pre-incubating oocytes expressing 5-HT<sub>3A</sub> and 5-HT<sub>3AB</sub>R with bupropion or its metabolite, results were compared to the current amplitudes resulting from co-application of 5-HT and bupropion/hydroxybupropion. First, oocytes were perfused with 5-HT ( $\sim$ EC<sub>30</sub>, 5-HT<sub>3A</sub>R: 0.5  $\mu$ M, 5-HT<sub>3AB</sub>R: 2  $\mu$ M) and bupropion ( $\sim$ IC<sub>50</sub>, 5-

HT<sub>3A</sub>R: 100  $\mu$ M, 5-HT<sub>3AB</sub>R: 1 mM) to obtain the control current (Fig. 4A). Once a stable response was achieved, a constant IC<sub>50</sub> concentration of bupropion was exposed to the receptors for exactly 5 min before another co-application of the same 5-HT and bupropion solutions. Pre-incubation decreased the current amplitude of 5-HT<sub>3A</sub>R to 76.1 $\pm$ 3.20% (Fig. 4C, left panel) of control, consistent with previous findings (Pandhare, 2017). On the contrary, under the same experimental conditions, 5-HT<sub>3AB</sub>R was greatly affected by pre-incubation, which resulted in a current amplitude reduced to 35.5 $\pm$ 2.29% of the control current (Fig. 4C, right panel). Similar results were obtained from hydroxybupropion pre-incubation (Fig. 4B). Compared to co-application alone, pre-application resulted in a greater depression of current for 5-HT<sub>3A</sub>R and 5-HT<sub>3AB</sub>R with hydroxybupropion (Fig. 4C, 5-HT<sub>3A</sub>R: 93.0 $\pm$ 2.50% and 5-HT<sub>3AB</sub>R: 46.1 $\pm$ 2.47% of control current).

### **Recovery times for Bupropion inhibition**

Bupropion's antagonistic effect on 5-HT-evoked inward currents has been shown to be reversible (Pandhare, 2017). To evaluate the recovery times for 5-HT<sub>3A</sub>R and 5-HT<sub>3AB</sub>R, bupropion at an IC<sub>200</sub> concentration was applied for 60 s to show an observable effect on the oocyte's current amplitudes and to better measure the time required to reverse the inhibitory effect. For these experiments, the  $\sim$ EC<sub>50</sub> concentration of 5-HT (grey bars, 5-HT<sub>3A</sub>R: 0.8  $\mu$ M, 5-HT<sub>3AB</sub>R: 5.0  $\mu$ M) was applied episodically after washing in between each application (5-HT<sub>3A</sub>R: 2 min, 5-HT<sub>3AB</sub>R: 90 s minimum). These agonist-induced currents led to minimal run-down and the difference in current amplitudes was less than 5% (Fig. 5A). Sample traces of current recovery following bupropion application and

removal are shown in Fig. 5B (left: black, 5-HT<sub>3A</sub>R, right: green, 5-HT<sub>3AB</sub>R). The first current response is the control current evoked by the agonist alone. Once a stable current response was obtained, bupropion was applied without the agonist for 60 s (magenta bars, ~IC<sub>200</sub>, 5-HT<sub>3A</sub>R: 400 μM; 5-HT<sub>3AB</sub>R: 4 mM). Subsequently, the agonist was either applied immediately or after 10, 30, or 60 s (Fig 5B, top trace: 0 s, middle: 30 s, bottom: 60 s) after bupropion exposure. The largest decrease in current amplitude for 5-HT<sub>3A</sub>R was immediately after the bupropion application, leaving 82.4±1.78% of the initial current (Fig 5C, left panel). Increased wash times between bupropion and 5-HT applications led to a larger recovered current amplitude (Fig 5C, left panel). 5-HT<sub>3AB</sub>R showed a larger decrease in current amplitude after bupropion application and immediate 5-HT perfusion, not only with regard to the current amplitude but also its effect on the characteristically fast desensitization kinetics. Direct application of 5-HT after 60 s exposure to 4 mM bupropion led to a slow inward current that showed no desensitization but a slowly increasing current that never stabilized and was terminated after ~3 min (Fig. 5B, first trace, right panel). After further washing, the fast activating inward current response exhibiting desensitization could be recovered. Due to the lack of a stable current response after 0 s of washing, the lowest current amplitude recorded was after 10 s of wash for 5-HT<sub>3AB</sub>R, with 18.1±2.19% of the initial current response (Fig 5C, right panel). Rapid recovery of current amplitude was achieved by increasing the wash times between bupropion and 5-HT applications (Fig 5C, right panel). 5-HT<sub>3A</sub>R and 5-HT<sub>3AB</sub>R both show stepwise and time-dependent recovery from bupropion inhibition, and can be fully reversed after 7+ min wash time.

## Voltage-independent binding of Bupropion

To determine if bupropion binds to 5-HT<sub>3</sub>R in a voltage-dependent manner, 5-HT-induced currents ( $\sim$ EC<sub>50</sub>; 5-HT<sub>3A</sub>R: 0.8  $\mu$ M; 5-HT<sub>3AB</sub>R: 5.0  $\mu$ M) were evoked in oocytes expressing 5-HT<sub>3A</sub>R and 5-HT<sub>3AB</sub>R at two different holding potentials, +40 and -40 mV (Fig 6A). First, the control current was obtained at positive and negative voltages before the co-application of 5-HT and bupropion ( $\sim$ IC<sub>50</sub>; 5-HT<sub>3A</sub>R: 100  $\mu$ M; 5-HT<sub>3AB</sub>R: 1mM). Bupropion reduced the current amplitudes of homo- and heteromeric receptors at both voltages. The mean fractional block was recorded at each voltage and normalized to the control current (Fig 6B; 5-HT<sub>3A</sub>R: 55.8 $\pm$ 0.06%, 59.8 $\pm$ 0.05%; 5-HT<sub>3AB</sub>R: 56.6 $\pm$ 0.02%, 59 $\pm$ 0.04%; -40 and +40 mV respectively, n=4). For 5-HT<sub>3A</sub>R and 5-HT<sub>3AB</sub>R, this fractional inhibition is similar at positive and negative voltages (paired t-test, 3A: t(3)=1.106, p=0.349; 3AB: t(3)=0.291, p=0.790). Based on these results, inhibition of 5-HT-induced currents by bupropion is independent of voltage.

## Bupropion at physiological concentrations and its effect on 5-HT<sub>3A</sub>R and 5-HT<sub>3AB</sub>R

To better understand the clinical significance of the bupropion-induced inhibition of 5-HT<sub>3</sub>R, 5-HT-induced currents were measured in the presence of a clinically relevant bupropion concentration ( $\sim$ 20  $\mu$ M, (Schroeder, 1983; Vazquez-Gomez, 2014)). First, oocytes expressing 5-HT<sub>3A</sub>R and 5-HT<sub>3AB</sub>R were exposed to three different 5-HT concentrations (0.5, 1.0, 5.0  $\mu$ M) in the absence of bupropion to obtain the initial current amplitudes (Fig 7A, black, left panel: 5-HT<sub>3A</sub>R, green, right panel: 5-HT<sub>3AB</sub>R). Next, the oocytes were continuously perfused with 20  $\mu$ M bupropion and the same 5-HT

concentrations were re-applied; the oocytes were pre-incubated with bupropion for at least for 2 minutes prior to 5-HT application (Fig 7A, magenta bars indicating bupropion presence). The results indicate that the continuous presence of a clinically relevant concentration of bupropion in the bath solution significantly inhibits 5-HT-induced currents of 5-HT<sub>3A</sub>R and 5-HT<sub>3AB</sub>R at all 5-HT concentrations tested (Fig 7B, paired t-test,  $p \leq 0.05$  or lower). Bupropion inhibited 5-HT-induced currents by ~18% for 5-HT<sub>3A</sub>R (n=4), whereas 5-HT<sub>3AB</sub>R showed a ~23% decrease in current (n=5, Fig 7B).

## **Discussion**

Our results, for the first time, demonstrate that bupropion antagonizes heteromeric 5-HT<sub>3AB</sub> receptors and that the kinetics of inhibition are distinct from 5-HT<sub>3A</sub>R. Two-electrode voltage clamp experiments indicate that bupropion reversibly inhibits 5-HT-induced currents of *Xenopus* oocytes expressing 5-HT<sub>3A</sub> and 5-HT<sub>3AB</sub>R in a concentration-dependent manner, with inhibitory potencies of 87.1  $\mu$ M (same as previously reported (Pandhare, 2017)) and 866  $\mu$ M respectively. Similar to other non-competitive antagonists (such as picrotoxin (Das, 2003)), bupropion has a lower potency (~10-fold) at 5-HT<sub>3AB</sub>R compared to 5-HT<sub>3A</sub> receptors and, therefore, could be used to discriminate between these two receptors (Thompson, 2013).

In humans, bupropion is extensively metabolized to the active metabolites hydroxybupropion and threohydrobupropion (Schroeder, 1983). One of these major metabolites, hydroxybupropion, is known to contribute to the biological efficacy of the

parent drug (Bondarev, 2003; Damaj, 2004; Martin, 1990). Similarly to bupropion, the metabolite inhibits nAChR and 5-HT<sub>3A</sub>R in a non-competitive manner (Damaj, 2004; Pandhare, 2017) and also shares a comparable potency (unpaired t-test, p value=0.08464) for the homomeric receptor (5-HT<sub>3A</sub>R: IC<sub>50</sub>= 113 μM, similar to previously reported data (Pandhare, 2017)). In contrast, hydroxybupropion exhibits a ~4.5-fold shift in IC<sub>50</sub> (5-HT<sub>3AB</sub>R: IC<sub>50</sub> = 505 μM).

Interestingly, bupropion and hydroxybupropion potentiate 5-HT-induced currents of 5-HT<sub>3AB</sub>R at low concentrations when co-applied with the agonist (Bup: 30 μM: 122.6±8.0%, n = 6; HydroB: 50 μM: 109.9±4.31%, n = 5), a phenomenon not observed with the 5-HT<sub>3A</sub>R. Similar potentiation has been observed for the antagonist atropine at neuronal nicotinic acetylcholine receptors (Parker, 2003; Zwart, 1997). Atropine potentiates acetylcholine-induced inward currents at low concentrations of the agonist but shows antagonistic activity at high concentrations of agonist or atropine. This phenomenon may be due to the drug acting on two distinct sites: one non-competitive inhibitory site and a second site associated with competitive potentiation (Zwart, 1997). Since we only observed potentiation in heteromeric 5-HT<sub>3AB</sub> channels, this may indicate that the 3B subunits are mediating this effect. The 3B subunits potentially contribute directly to the potentiating binding site or mediate the effect via an allosteric mechanism. Bupropion-mediated inhibition of 5-HT<sub>3A</sub>R is non-use dependent (Pandhare 2017); the drug can access its binding site in a closed receptor state and inhibit the transition to an open state. In general, use-dependent block, or inhibition that would require a channel to be open to occur, is not influenced by pre-application. We evaluated the effect of a 5-min pre-incubation with bupropion and its metabolite hydroxybupropion on the



homomeric and the heteromeric receptor (Fig. 4). Pre-incubation with inhibitor lead to an increased inhibition in all cases when compared to co-application, indicating that the block is non-use dependent for both receptors. Our observation that bupropion's inhibition of 5-HT<sub>3</sub>R is voltage-independent additionally concurs with it not acting as an open channel blocker (Choi, 2003; Garcia-Colunga, 2011; Gumilar, 2003; Gumilar, 2008; Slemmer, 2000). Similar results are shown with other antidepressants at 5-HT<sub>3</sub>R (Eisensamer, 2003) and with bupropion at nAChR (e.g.  $\alpha_3\beta_2$ ,  $\alpha_4\beta_2$ ,  $\alpha_3\beta_4$ ) with predictions for an external binding site for bupropion (Garcia-Colunga, 2011; Slemmer, 2000). Considering different binding sites within the family of AChR (Pandhare, 2012), bupropion may have distinct binding sites in each channel (Arias, 2009b).

We saw a greater depression of current amplitudes when bupropion or its metabolite was pre-incubated as compared to co-application with 5-HT (Fig 5, 5-HT<sub>3A</sub>R: 76.2±3.20%, 93.0±2.50%; 5-HT<sub>3AB</sub>R: 35.5±2.29%, 46.1±2.47% of control current, Bup and HydroB respectively). During the pre-incubation experiments, bupropion binds and blocks the receptor prior to the opening of the channel, therefore presumably interacting with the closed channel and potentially inhibiting the channel from opening (Arias, 2009b; Choi, 2003). Consistent with other data, greater potencies of inhibition have been reported for bupropion and tricyclic antidepressants on Cys-loop receptors in the resting state than the open state (Arias, 2009b; Choi, 2003; Gumilar, 2008). This phenomenon may be due to the accumulation of antidepressants and antipsychotics in the cell membrane during pre-incubation, which may be important for the functional antagonistic effects of these drugs at the 5-HT<sub>3</sub> receptor (Eisensamer, 2005).

Bupropion's inhibition of 5-HT-mediated currents is reversible after a substantial amount of washing. In this study, we investigated the time it takes for 5-HT<sub>3</sub>R to recover from pre-incubation with bupropion at high concentrations (~IC<sub>200</sub>; 5-HT<sub>3A</sub>R: 400 μM; 5-HT<sub>3AB</sub>R: 4 mM). Similarly to our pre-incubation experiments, bupropion reduced 5-HT<sub>3A</sub>R currents significantly but to a lesser extent than 5-HT<sub>3AB</sub>R. The largest reduction of current was observed with the shortest amount of wash time between the bupropion and agonist applications (5-HT<sub>3A</sub>R: 82.4±1.78% after 0 s wash; 5-HT<sub>3AB</sub>R: 18.1±2.19% of the control current after 10 s wash). For 5-HT<sub>3AB</sub>R, the immediate switch to 5-HT could not be quantified because the current never stabilized and was continuously increasing. This behavior is very uncharacteristic for 5-HT<sub>3AB</sub>R. We speculate that this high concentration of bupropion may accumulate in the membrane and stabilize the receptor in a closed position. In the 5-HT<sub>3AB</sub>R trace we may be observing the effect of bupropion being washed away over time during the application of the agonist, which results in the receptor opening and a very prolonged inward current. 5-HT<sub>3A</sub> and 5-HT<sub>3AB</sub> receptors show a time-dependent recovery from bupropion's inhibition, and their currents could be fully recovered after ~7.5 min of washing.

The clinical relevance of 5-HT<sub>3</sub>-inhibition by bupropion is currently unknown. Bupropion, but not its metabolites, concentrates in many tissues, with a brain to plasma ratio of 25:1 (Schroeder, 1983), which results in brain concentrations of ~20 μM (Vazquez-Gomez, 2014). Although 20 μM bupropion co-applied with agonist minimally inhibits 5-HT-induced currents of 5-HT<sub>3A</sub>R and possibly potentiates HT<sub>3AB</sub>R, pre-incubation with bupropion has a significant impact on its inhibitory effect (Fig. 7). Our results indicate that 5-HT<sub>3</sub> receptors are significantly inhibited by 20 μM bupropion with a minimal pre-

incubation time of 5 minutes (5-HT<sub>3A</sub>R: ~82.7% 5-HT<sub>3AB</sub>R: ~74.9% of control current). Moreover, hydroxybupropion also contributes to bupropion's antidepressant activity (Bondarev, 2003; Damaj, 2004; Martin, 1990). The metabolite reaches ~10-fold higher plasma concentrations in humans as compared to the parent drug (Findlay, 1981; Golden, 1988; Hsyu, 1997): with an average of almost 100 µM (based on clinical data, test ID: FBUMT; Mayo Clinic, MN), hydroxybupropion's plasma concentrations are equivalent to 5-HT<sub>3A</sub>R's IC<sub>50</sub> value. Additionally, considering the increased inhibitory effect due to pre-incubation of 5-HT<sub>3</sub>R, we conclude that bupropion and hydroxybupropion have the potential to inhibit these receptors at physiologically relevant concentrations.

The comprehensive mechanism by which bupropion achieves its therapeutic efficacy is multifactorial. Bupropion inhibits nAChR and reuptake transporters for dopamine and norepinephrine. Due to low DAT occupancy in humans (~26%: (Stahl, 2004)) it's been hypothesized that dopamine reuptake inhibition is only partially responsible for its therapeutic effects in human subjects (Argyelan, 2005; Arias, 2009a). At therapeutic dosages, bupropion inhibits nACh receptors in the ventral tegmental area, dorsal raphe nucleus neurons, and interneurons in the hippocampal CA1 area (Alkondon, 2005; Arias, 2009a; Vazquez-Gomez, 2014). There, nAChR can modulate serotonergic projections (Aznar, 2005; Chang, 2011) and alter GABAergic transmission (Ji, 2000), in turn increasing dopamine levels, contributing to bupropion's antidepressant activity (Arias, 2009a; Vazquez-Gomez, 2014).

5-HT<sub>3</sub> receptors are localized in several areas involved in mood regulation, such as the hippocampus and prefrontal cortex (Bétry, 2011), and are found both pre- and post-

synaptically where they modulate the release of many other neurotransmitters (Chameau, 2006; Faerber, 2007; Miquel, 2002; Nayak, 2000). For instance, 5-HT<sub>3</sub> receptors and GABAergic neurons show strong interactions in the hippocampus and neocortical cells (Morales, 1996; Morales, 1997). Additionally, 5-HT<sub>3</sub> receptors mediate stress-dependent activation of dopaminergic neurotransmission (Bhatt, 2013; Devadoss, 2010). Although 5-HT<sub>3</sub> antagonist's clinical relevance is mainly concerned with emesis, several studies have reported their potential role for treating mood and anxiety disorders (Bhatt, 2013; Thompson, 2007; Walstab, 2010). In humans, 5-HT<sub>3</sub> antagonists show improvements of comorbid depression for patients suffering from complex disorders (Faris, 2006; Haus, 2000). Animal studies conclude that the antagonist's anxiolytic activity is due to the inhibition of limbic hyperactivity responses (Bhatt, 2013), supported by the results that 5-HT<sub>3A</sub>R gene deletion produces an anxiolytic phenotype in mice (Kelley, 2003a). Furthermore, 5-HT<sub>3</sub> antagonists have implications on hippocampal long-term potentiation (Bétry, 2011), increase synaptic NE levels, and facilitate 5-HT neurotransmission of other 5-HT receptors (Rajkumar, 2010). Also, several clinically available antidepressant and antipsychotic drugs have antagonistic activities at 5-HT<sub>3</sub> receptors (Bétry, 2011; Choi, 2003; Eisensamer, 2003; Rammes, 2004). Interestingly, 5-HT<sub>3</sub> antagonists have shown to enhance the antidepressant action of bupropion (Devadoss, 2010). In conclusion, 5-HT<sub>3</sub> and nACh receptors have shown many implications in the neurobiology of depression and a highly complex interplay can be expected between these systems. Currently, it is not known if bupropion- or hydroxybupropion-mediated inhibition of 5-HT<sub>3</sub> receptors is clinically relevant for their antidepressant activity. We show here that bupropion inhibits 5-HT<sub>3</sub>

receptors at clinically-relevant concentrations, and that this inhibition may contribute to bupropion's desired and undesired clinical effects.

## **Acknowledgments**

Research reported in this publication was supported by the National Institute of Neurological Disorders and Stroke of the National Institutes of Health under award number R01NS077114 (to MJ). The content is solely the responsibility of the authors and does not necessarily represent the official views of the National Institutes of Health. We thank Dr. Myles Akabas (Einstein, NY) for providing us with the 5-HT<sub>3B</sub> plasmid. We thank the TTUHSC Core Facilities: some of the images and or data were generated in the Image Analysis Core Facility & Molecular Biology Core Facility supported by TTUHSC.

## **Conflict of Interest**

The authors declare no conflict of interest

## **Author Contributions**

A.G.S. and M.J. developed the study concept and design. A.G.S. performed experiments, acquired and analyzed data. A.G.S. and M.J. wrote the manuscript.

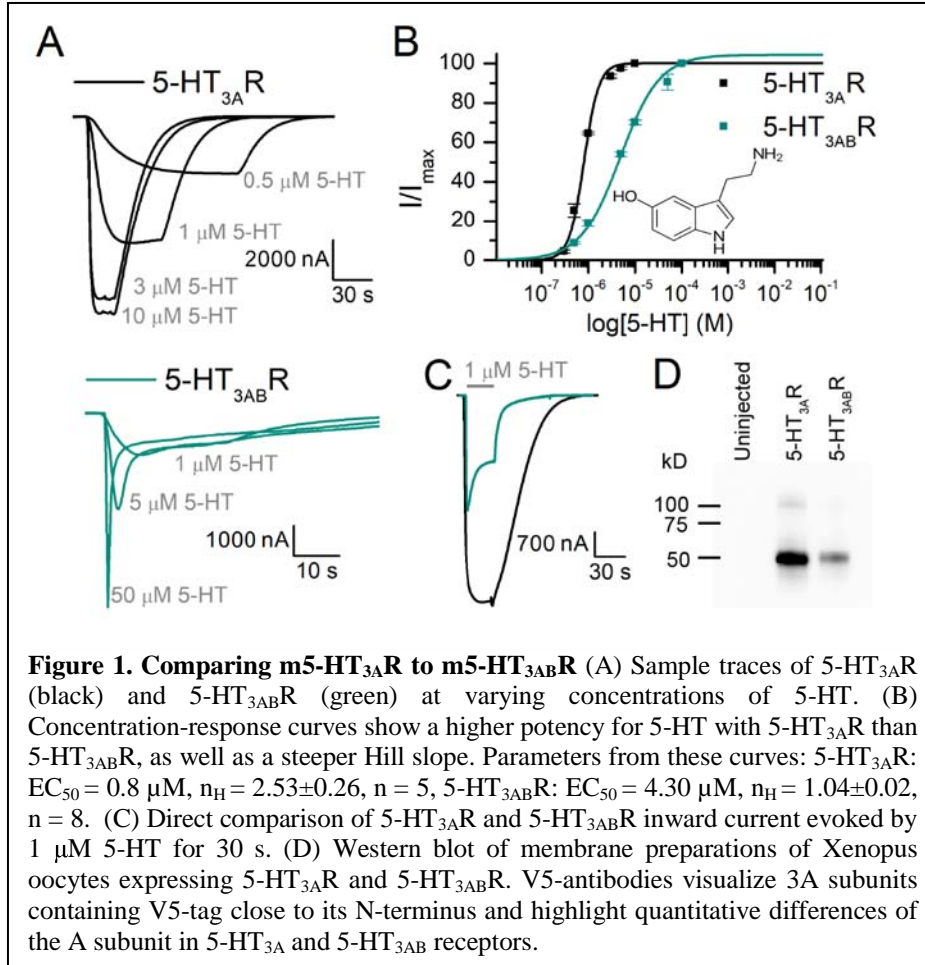

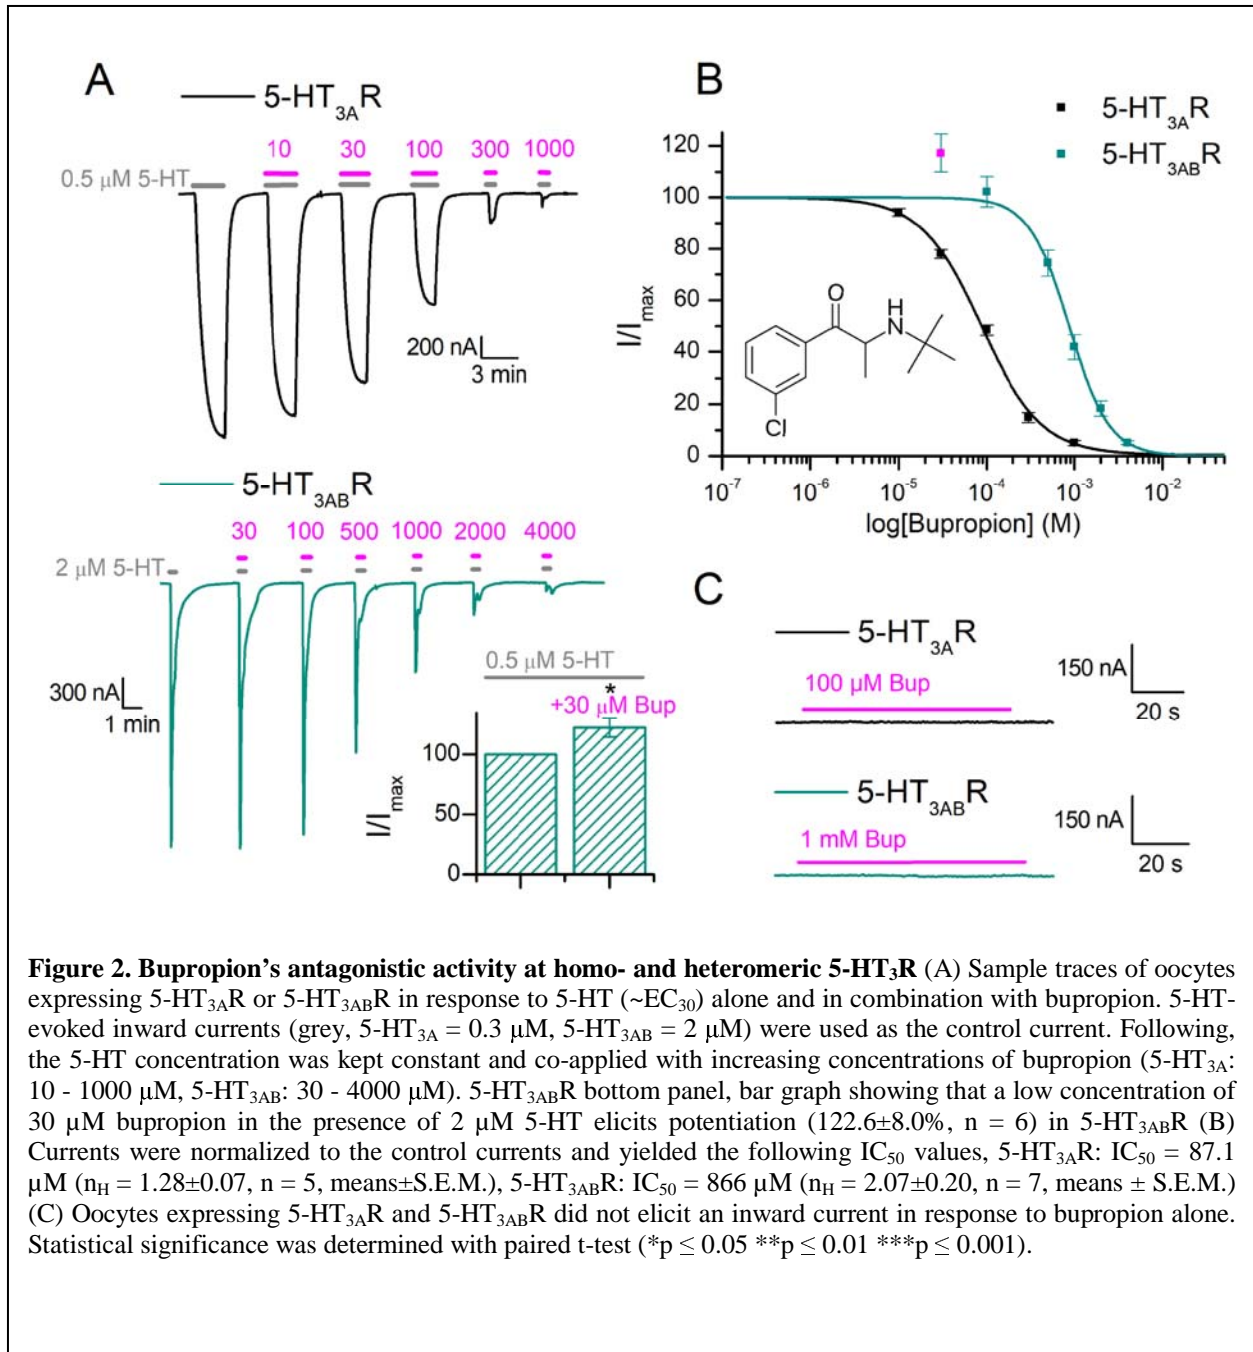

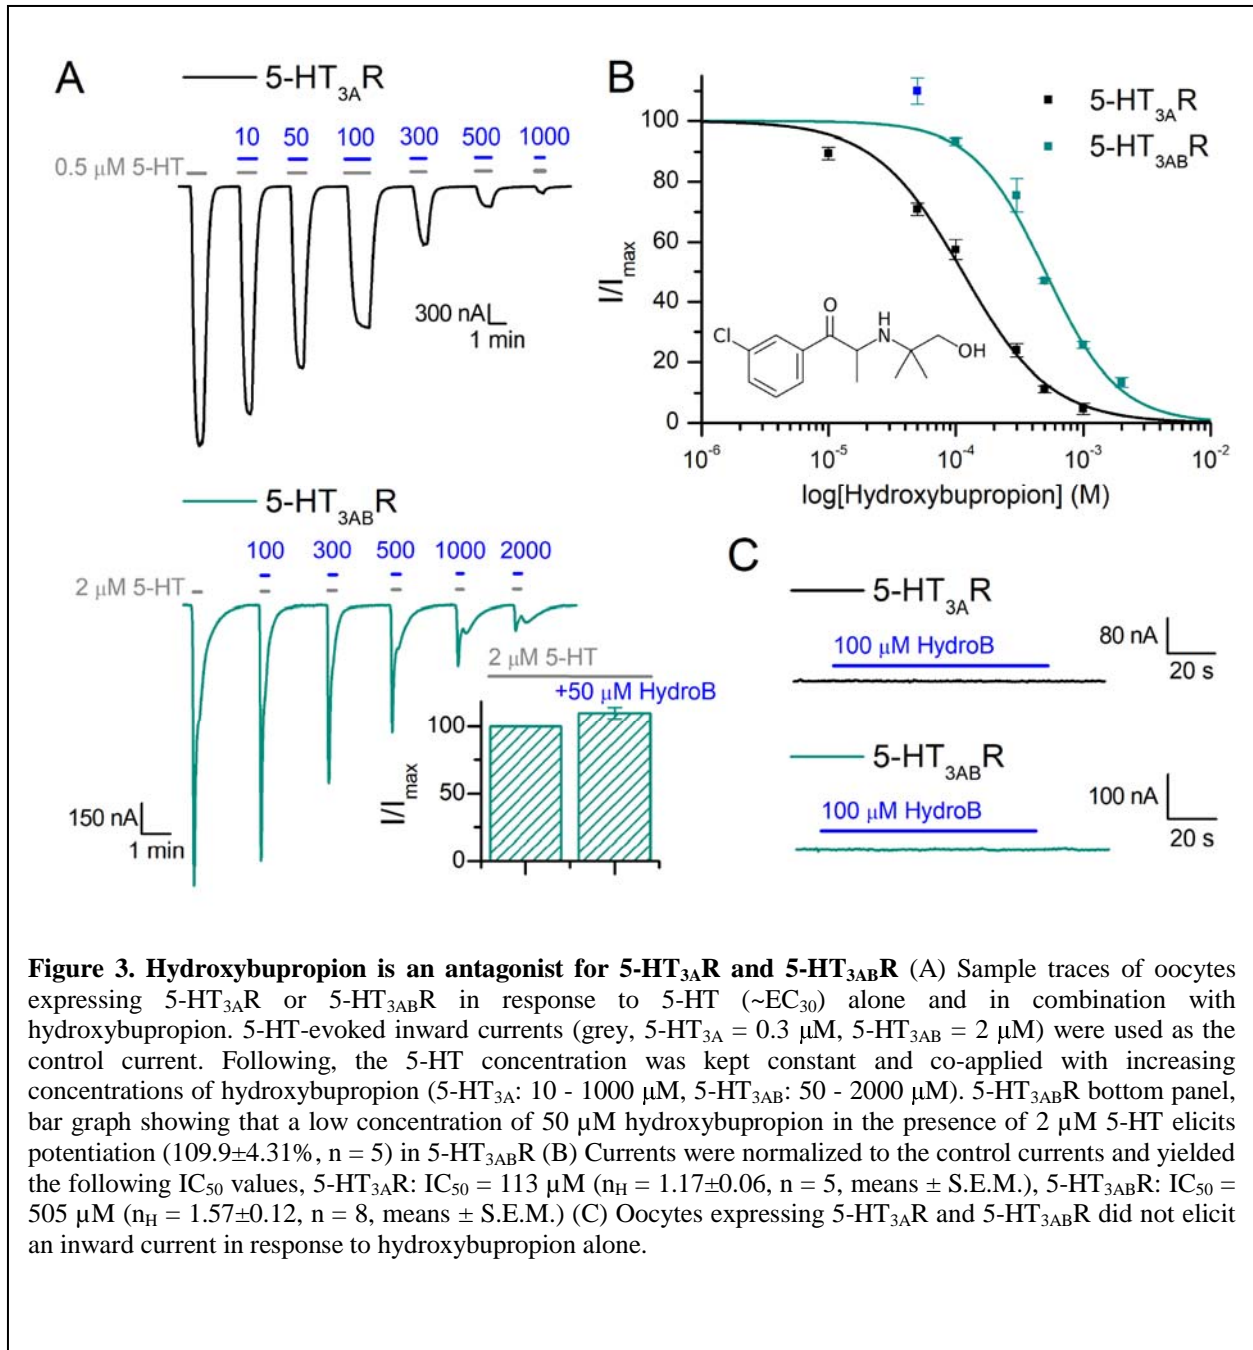



Table 1. EC<sub>50</sub> (5-HT) and IC<sub>50</sub> (bupropion and hydroxybupropion) of *Xenopus laevis* oocytes expressing 5-HT<sub>3A</sub>R and 5-HT<sub>3AB</sub>R

|                            | <b>Agonist</b>    | <b>pEC<sub>50</sub> (μM,<br/>mean±S.E.M.)</b> | <b>EC<sub>50</sub></b> | <b>n<sub>H</sub><br/>(mean±S.E.M.)</b> | <b>n</b> |
|----------------------------|-------------------|-----------------------------------------------|------------------------|----------------------------------------|----------|
| <b>5-HT<sub>3A</sub>R</b>  | 5-HT              | 6.10±0.02                                     | 0.80                   | 2.53±0.26                              | 5        |
| <b>5-HT<sub>3AB</sub>R</b> |                   | 5.38±0.02                                     | 4.30                   | 1.04±0.02                              | 8        |
|                            | <b>Antagonist</b> | <b>pIC<sub>50</sub> (μM,<br/>mean±S.E.M.)</b> | <b>IC<sub>50</sub></b> | <b>n<sub>H</sub><br/>(mean±S.E.M.)</b> | <b>n</b> |
| <b>5-HT<sub>3A</sub>R</b>  | Bupropion         | 4.06±0.05                                     | 87.1                   | 1.28±0.07                              | 5        |
| <b>5-HT<sub>3AB</sub>R</b> |                   | 3.07±0.04                                     | 866                    | 2.07±0.20                              | 7        |
| <b>5-HT<sub>3A</sub>R</b>  | Hydroxybupropion  | 3.95±0.04                                     | 113                    | 1.17±0.06                              | 5        |
| <b>5-HT<sub>3AB</sub>R</b> |                   | 3.31±0.02                                     | 505                    | 1.57±0.12                              | 8        |

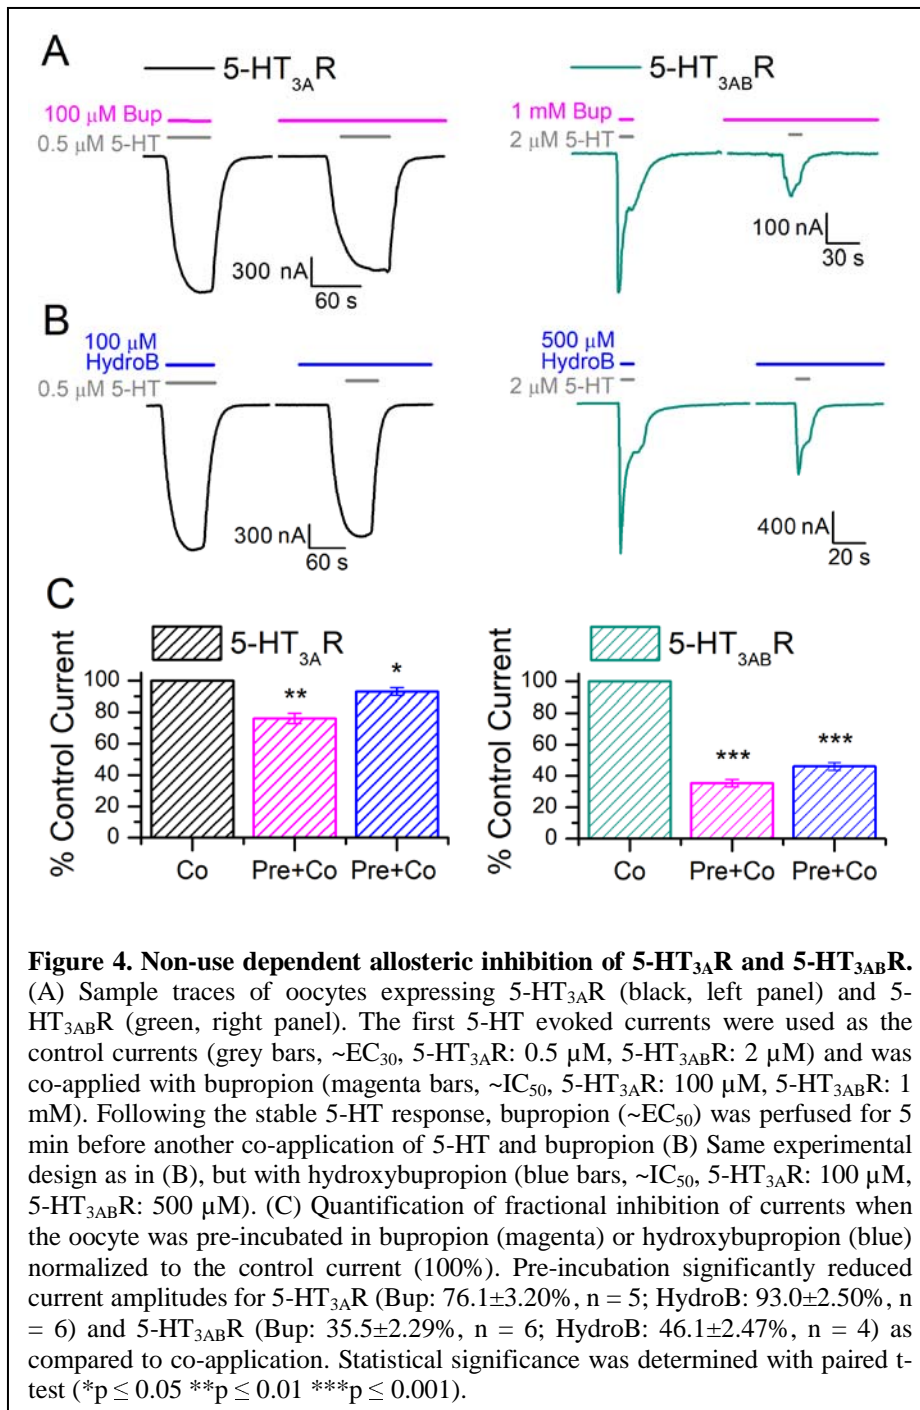

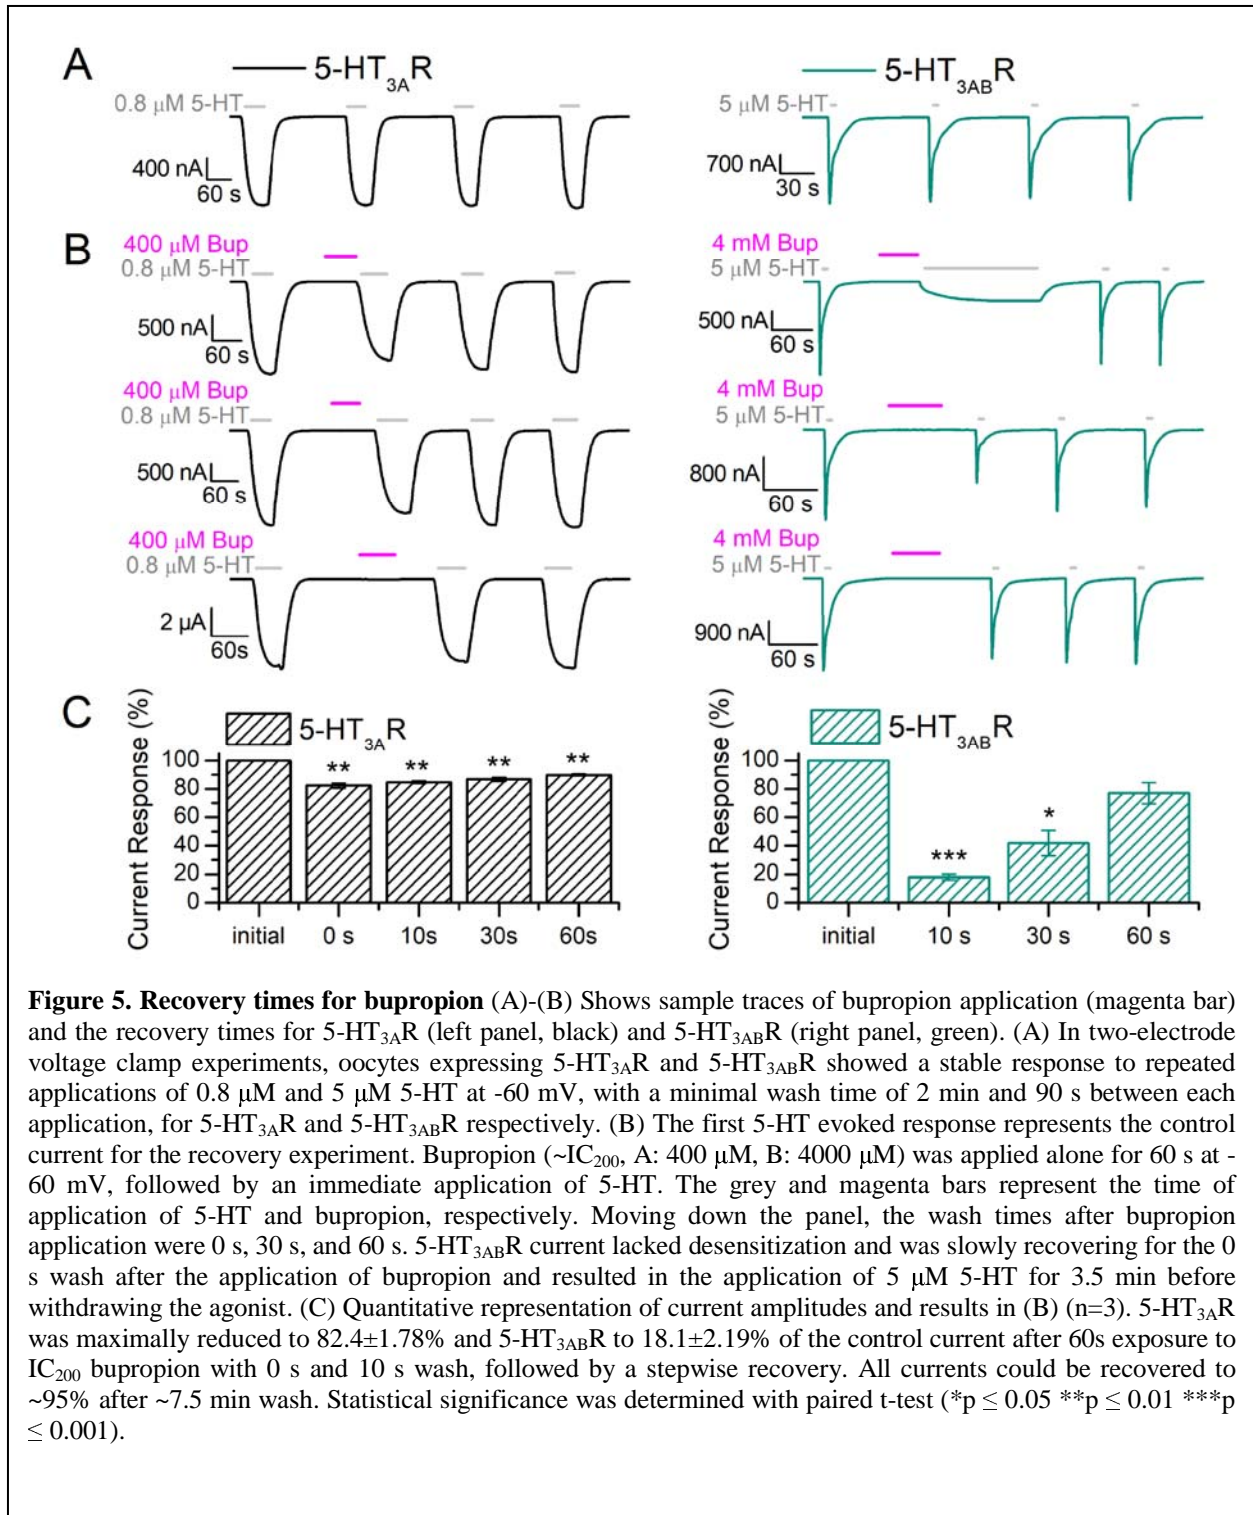

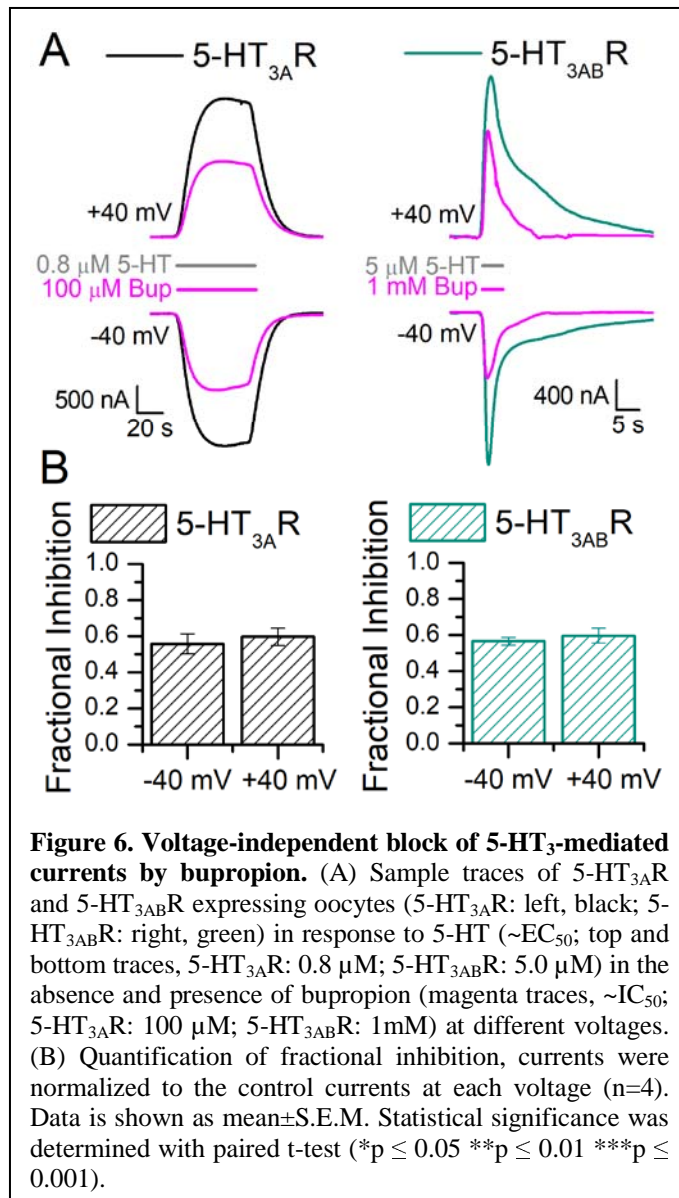

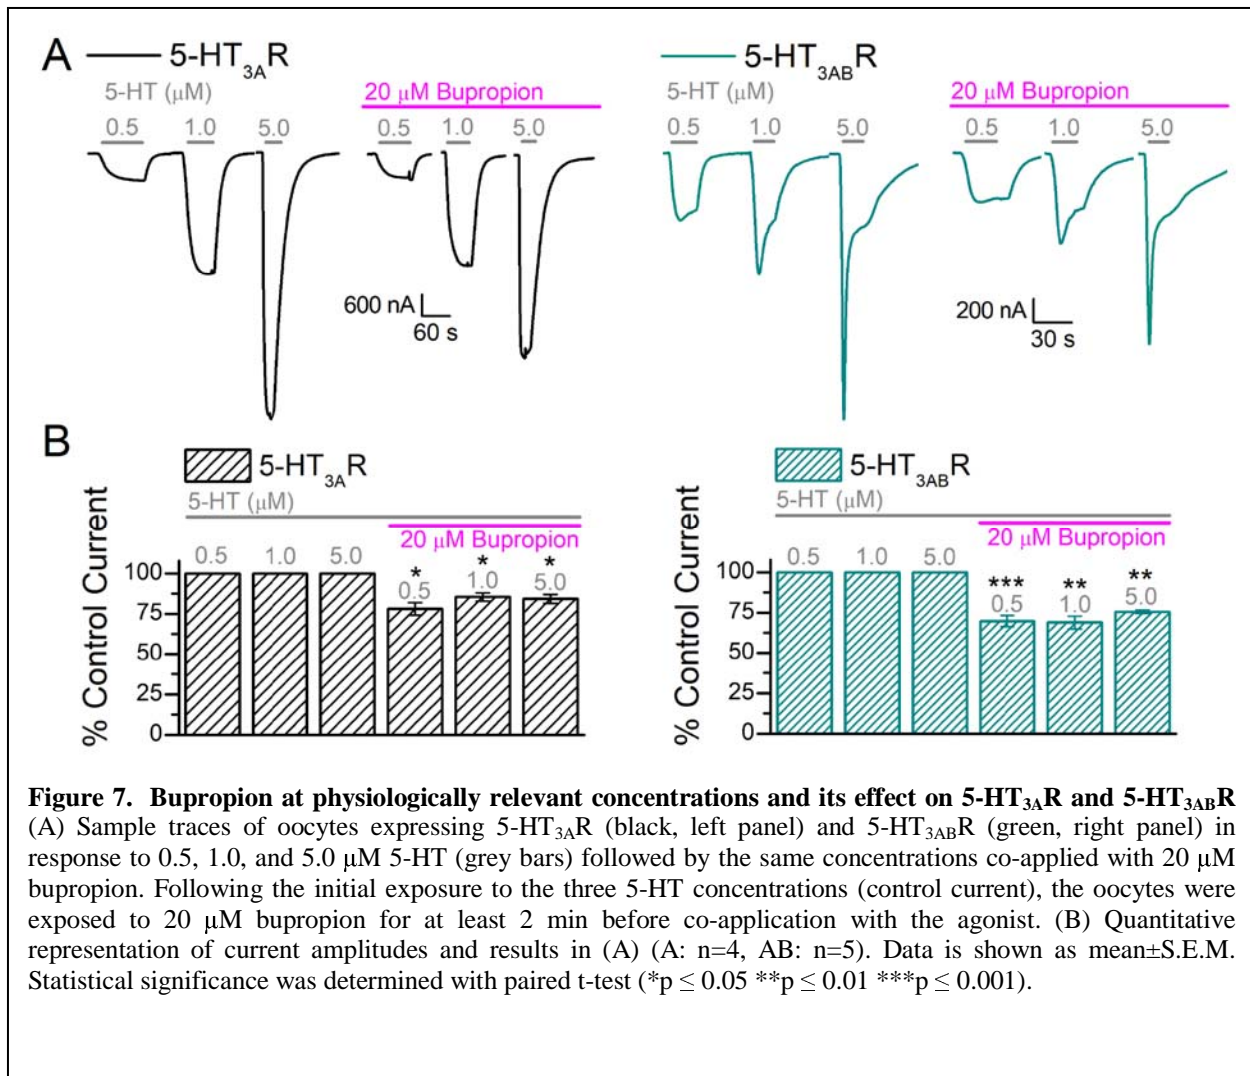

- Alkondon, M., and E.X. Albuquerque. 2005. Nicotinic receptor subtypes in rat hippocampal slices are differentially sensitive to desensitization and early in vivo functional up-regulation by nicotine and to block by bupropion. *J Pharmacol Exp Ther.* 313:740-750.
- Argyelan, M., Z. Szabo, B. Kanyo, A. Tanacs, Z. Kovacs, Z. Janka, and L. Pavics. 2005. Dopamine transporter availability in medication free and in bupropion treated depression: a 99mTc-TRODAT-1 SPECT study. *J Affect Disord.* 89:115-123.
- Arias, H.R. 2009a. Is the inhibition of nicotinic acetylcholine receptors by bupropion involved in its clinical actions? *Int J Biochem Cell Biol.* 41:2098-2108.
- Arias, H.R., F. Gumilar, A. Rosenberg, K.M. Targowska-Duda, D. Feuerbach, K. Jozwiak, R. Moaddel, I.W. Wainer, and C. Bouzat. 2009b. Interaction of bupropion with muscle-type nicotinic acetylcholine receptors in different conformational states. *Biochemistry.* 48:4506-4518.
- Aznar, S., V. Kostova, S.H. Christiansen, and G.M. Knudsen. 2005. Alpha 7 nicotinic receptor subunit is present on serotonin neurons projecting to hippocampus and septum. *Synapse.* 55:196-200.
- Barnes, J.M., N.M. Barnes, B. Costall, J.W. Ironside, and R.J. Naylor. 1989. Identification and characterisation of 5-hydroxytryptamine 3 recognition sites in human brain tissue. *J Neurochem.* 53:1787-1793.
- Bétry, C., A. Etiévant, C. Oosterhof, B. Ebert, C. Sanchez, and N. Haddjeri. 2011. Role of 5-HT(3) Receptors in the Antidepressant Response. *Pharmaceuticals (Basel).* 2011 Apr 7;4(4):603-29. doi: 10.3390/ph4040603. eCollection 2011 Apr.
- Bhatt, S., R. Mahesh, T. Devadoss, and A.K. Jindal. 2013. Antidepressant-like effect of novel 5-HT3 receptor antagonist N-n-butyl-3-ethoxyquinoxalin-2-carboxamide (6p): an approach using rodent behavioral antidepressant tests. *Indian J Pharmacol.* 45:348-353.
- Bondarev, M.L., T.S. Bondareva, R. Young, and R.A. Glennon. 2003. Behavioral and biochemical investigations of bupropion metabolites. *Eur J Pharmacol.* 474:85-93.
- Chameau, P., and J.A. van Hooft. 2006. Serotonin 5-HT(3) receptors in the central nervous system. *Cell Tissue Res.* 326:573-581.
- Chang, B., C.A. Daniele, K. Gallagher, M. Madonia, R.D. Mitchum, L. Barrett, P. Vezina, and D.S. McGehee. 2011. Nicotinic excitation of serotonergic projections from dorsal raphe to the nucleus accumbens. *J Neurophysiol.* 106:801-808.
- Choi, J.S., B.H. Choi, H.S. Ahn, M.J. Kim, D.J. Rhie, S.H. Yoon, D.S. Min, Y.H. Jo, M.S. Kim, K.W. Sung, and S.J. Hahn. 2003. Mechanism of block by fluoxetine of 5-hydroxytryptamine3 (5-HT3)-mediated currents in NCB-20 neuroblastoma cells. *Biochem Pharmacol.* 66:2125-2132.
- Corradi, J., A.J. Thompson, I. McGonigle, K.L. Price, C. Bouzat, and S.C. Lummis. 2015. 5-HT3 Receptor Brain-Type B-Subunits are Differentially Expressed in Heterologous Systems. *ACS Chem Neurosci.* 6:1158-1164.
- Damaj, M.I., F.I. Carroll, J.B. Eaton, H.A. Navarro, B.E. Blough, S. Mirza, R.J. Lukas, and B.R. Martin. 2004. Enantioselective effects of hydroxy metabolites of bupropion on behavior and on function of monoamine transporters and nicotinic receptors. *Mol Pharmacol.* 66:675-682.
- Das, P., and G.H. Dillon. 2003. The 5-HT3B subunit confers reduced sensitivity to picrotoxin when co-expressed with the 5-HT3A receptor. *Brain Res Mol Brain Res.* 119:207-212.
- Davies, P.A., M. Pistis, M.C. Hanna, J.A. Peters, J.J. Lambert, T.G. Hales, and E.F. Kirkness. 1999. The 5-HT3B subunit is a major determinant of serotonin-receptor function. *Nature.* 397:359-363.
- Devadoss, T., D.K. Pandey, R. Mahesh, and S.K. Yadav. 2010. Effect of acute and chronic treatment with QCF-3 (4-benzylpiperazin-1-yl) (quinoxalin-2-yl) methanone, a novel 5-HT(3) receptor antagonist, in animal models of depression. *Pharmacol Rep.* 62:245-257.
- Dubin, A.E., R. Huvar, M.R. D'Andrea, J. Pyati, J.Y. Zhu, K.C. Joy, S.J. Wilson, J.E. Galindo, C.A. Glass, L. Luo, M.R. Jackson, T.W. Lovenberg, and M.G. Erlander. 1999. The pharmacological and

- functional characteristics of the serotonin 5-HT(3A) receptor are specifically modified by a 5-HT(3B) receptor subunit. *J Biol Chem.* 274:30799-30810.
- Eisensamer, B., G. Rammes, G. Gimpl, M. Shapa, U. Ferrari, G. Hapfelmeier, B. Bondy, C. Parsons, K. Gilling, W. Zieglgansberger, F. Holsboer, and R. Rupprecht. 2003. Antidepressants are functional antagonists at the serotonin type 3 (5-HT3) receptor. *Mol Psychiatry.* 8:994-1007.
- Eisensamer, B., M. Uhr, S. Meyr, G. Gimpl, T. Deiml, G. Rammes, J.J. Lambert, W. Zieglgansberger, F. Holsboer, and R. Rupprecht. 2005. Antidepressants and antipsychotic drugs colocalize with 5-HT3 receptors in raft-like domains. *J Neurosci.* 25:10198-10206.
- Faerber, L., S. Drechsler, S. Ladenburger, H. Gschaidmeier, and W. Fischer. 2007. The neuronal 5-HT3 receptor network after 20 years of research--evolving concepts in management of pain and inflammation. *Eur J Pharmacol.* 560:1-8.
- Faris, P.L., E.D. Eckert, S.W. Kim, W.H. Meller, J.V. Pardo, R.L. Goodale, and B.K. Hartman. 2006. Evidence for a vagal pathophysiology for bulimia nervosa and the accompanying depressive symptoms. *J Affect Disord.* 92:79-90.
- Fiebich, B.L., R.S. Akundi, M. Seidel, V. Geyer, U. Haus, W. Muller, T. Stratz, and E. Candelario-Jalil. 2004. Expression of 5-HT3A receptors in cells of the immune system. *Scand J Rheumatol Suppl.* 119:9-11.
- Findlay, J.W., J. Van Wyck Fleet, P.G. Smith, R.F. Butz, M.L. Hinton, M.R. Blum, and D.H. Schroeder. 1981. Pharmacokinetics of bupropion, a novel antidepressant agent, following oral administration to healthy subjects. *Eur J Clin Pharmacol.* 21:127-135.
- Fryer, J.D., and R.J. Lukas. 1999. Noncompetitive functional inhibition at diverse, human nicotinic acetylcholine receptor subtypes by bupropion, phencyclidine, and ibogaine. *J Pharmacol Exp Ther.* 288:88-92.
- Garcia-Colunga, J., U. Godoy-Garcia, and E. Vazquez-Gomez. 2011. Interaction of bupropion and zinc with neuronal nicotinic acetylcholine receptors. *Neuropharmacology.* 61:1202-1209.
- Golden, R.N., C.L. De Vane, S.C. Laizure, M.V. Rudorfer, M.A. Sherer, and W.Z. Potter. 1988. Bupropion in depression. II. The role of metabolites in clinical outcome. *Arch Gen Psychiatry.* 45:145-149.
- Goyal, R., A.A. Salahudeen, and M. Jansen. 2011. Engineering a prokaryotic Cys-loop receptor with a third functional domain. *J Biol Chem.* 286:34635-34642.
- Gumilar, F., H.R. Arias, G. Spitzmaul, and C. Bouzat. 2003. Molecular mechanisms of inhibition of nicotinic acetylcholine receptors by tricyclic antidepressants. *Neuropharmacology.* 45:964-976.
- Gumilar, F., and C. Bouzat. 2008. Tricyclic antidepressants inhibit homomeric Cys-loop receptors by acting at different conformational states. *Eur J Pharmacol.* 584:30-39.
- Hanna, M.C., P.A. Davies, T.G. Hales, and E.F. Kirkness. 2000. Evidence for expression of heteromeric serotonin 5-HT(3) receptors in rodents. *J Neurochem.* 75:240-247.
- Hannon, J., and D. Hoyer. 2008. Molecular biology of 5-HT receptors. *Behav Brain Res.* 195:198-213.
- Hassaine, G., C. Deluz, L. Grasso, R. Wyss, M.B. Tol, R. Hovius, A. Graff, H. Stahlberg, T. Tomizaki, A. Desmyter, C. Moreau, X.D. Li, F. Poitevin, H. Vogel, and H. Nury. 2014. X-ray structure of the mouse serotonin 5-HT3 receptor. *Nature.* 512:276-281.
- Haus, U., B. Varga, T. Stratz, M. Spath, and W. Muller. 2000. Oral treatment of fibromyalgia with tropisetron given over 28 days: influence on functional and vegetative symptoms, psychometric parameters and pain. *Scand J Rheumatol Suppl.* 113:55-58.
- Hayrapetyan, V., M. Jenschke, G.H. Dillon, and T.K. Machu. 2005. Co-expression of the 5-HT(3B) subunit with the 5-HT(3A) receptor reduces alcohol sensitivity. *Brain Res Mol Brain Res.* 142:146-150.
- Hogg, R.C., M. Raggenbass, and D. Bertrand. 2003. Nicotinic acetylcholine receptors: from structure to brain function. *Rev Physiol Biochem Pharmacol.* 147:1-46.
- Hoyer, D., J.P. Hannon, and G.R. Martin. 2002. Molecular, pharmacological and functional diversity of 5-HT receptors. *Pharmacol Biochem Behav.* 71:533-554.

- Hsyu, P.H., A. Singh, T.D. Giargiari, J.A. Dunn, J.A. Ascher, and J.A. Johnston. 1997. Pharmacokinetics of bupropion and its metabolites in cigarette smokers versus nonsmokers. *J Clin Pharmacol.* 37:737-743.
- Hussy, N., W. Lukas, and K.A. Jones. 1994. Functional properties of a cloned 5-hydroxytryptamine ionotropic receptor subunit: comparison with native mouse receptors. *J Physiol.* 481 ( Pt 2):311-323.
- Jansen, M., M. Bali, and M.H. Akabas. 2008. Modular design of Cys-loop ligand-gated ion channels: functional 5-HT<sub>3</sub> and GABA rho1 receptors lacking the large cytoplasmic M3M4 loop. *J Gen Physiol.* 131:137-146.
- Ji, D., and J.A. Dani. 2000. Inhibition and disinhibition of pyramidal neurons by activation of nicotinic receptors on hippocampal interneurons. *J Neurophysiol.* 83:2682-2690.
- Jones, D.N., N.M. Barnes, B. Costall, A.M. Domeney, G.J. Kilpatrick, R.J. Naylor, and M.B. Tyers. 1992. The distribution of 5-HT<sub>3</sub> recognition sites in the marmoset brain. *Eur J Pharmacol.* 215:63-67.
- Karnovsky, A.M., L.F. Gotow, D.D. McKinley, J.L. Piechan, C.L. Ruble, C.J. Mills, K.A. Schellin, J.L. Slightom, L.R. Fitzgerald, C.W. Benjamin, and S.L. Roberds. 2003. A cluster of novel serotonin receptor 3-like genes on human chromosome 3. *Gene.* 319:137-148.
- Kelley, S.P., A.M. Bratt, and C.W. Hodge. 2003a. Targeted gene deletion of the 5-HT<sub>3A</sub> receptor subunit produces an anxiolytic phenotype in mice. *Eur J Pharmacol.* 461:19-25.
- Kelley, S.P., J.I. Dunlop, E.F. Kirkness, J.J. Lambert, and J.A. Peters. 2003b. A cytoplasmic region determines single-channel conductance in 5-HT<sub>3</sub> receptors. *Nature.* 424:321-324.
- Lemoine, D., R. Jiang, A. Taly, T. Chataigneau, A. Specht, and T. Grutter. 2012. Ligand-gated ion channels: new insights into neurological disorders and ligand recognition. *Chem Rev.* 112:6285-6318.
- Lochner, M., and S.C. Lummis. 2010. Agonists and antagonists bind to an A-A interface in the heteromeric 5-HT<sub>3AB</sub> receptor. *Biophys J.* 98:1494-1502.
- Lummis, S.C. 2012. 5-HT(3) receptors. *J Biol Chem.* 287:40239-40245.
- Maricq, A.V., A.S. Peterson, A.J. Brake, R.M. Myers, and D. Julius. 1991. Primary structure and functional expression of the 5HT<sub>3</sub> receptor, a serotonin-gated ion channel. *Science.* 254:432-437.
- Martin, P., J. Massol, J.N. Colin, L. Lacomblez, and A.J. Puech. 1990. Antidepressant profile of bupropion and three metabolites in mice. *Pharmacopsychiatry.* 23:187-194.
- Miquel, M.C., M.B. Emerit, A. Nosjean, A. Simon, P. Rumajogee, M.J. Brisorgueil, E. Doucet, M. Hamon, and D. Verge. 2002. Differential subcellular localization of the 5-HT<sub>3A</sub> receptor subunit in the rat central nervous system. *Eur J Neurosci.* 15:449-457.
- Miyake, A., S. Mochizuki, Y. Takemoto, and S. Akuzawa. 1995. Molecular cloning of human 5-hydroxytryptamine<sub>3</sub> receptor: heterogeneity in distribution and function among species. *Molecular Pharmacology.* 48:407-416.
- Morales, M., E. Battenberg, L. de Lecea, and F.E. Bloom. 1996. The type 3 serotonin receptor is expressed in a subpopulation of GABAergic neurons in the rat neocortex and hippocampus. *Brain Res.* 731:199-202.
- Morales, M., and F.E. Bloom. 1997. The 5-HT<sub>3</sub> receptor is present in different subpopulations of GABAergic neurons in the rat telencephalon. *J Neurosci.* 17:3157-3167.
- Nayak, S.V., P. Ronde, A.D. Spier, S.C. Lummis, and R.A. Nichols. 2000. Nicotinic receptors co-localize with 5-HT(3) serotonin receptors on striatal nerve terminals. *Neuropharmacology.* 39:2681-2690.
- Niesler, B. 2011. 5-HT(3) receptors: potential of individual isoforms for personalised therapy. *Curr Opin Pharmacol.* 11:81-86.
- Niesler, B., B. Frank, J. Kapeller, and G.A. Rappold. 2003. Cloning, physical mapping and expression analysis of the human 5-HT<sub>3</sub> serotonin receptor-like genes HTR3C, HTR3D and HTR3E. *Gene.* 310:101-111.



- Niesler, B., J. Walstab, S. Combrink, D. Moller, J. Kapeller, J. Rietdorf, H. Bonisch, M. Gothert, G. Rappold, and M. Bruss. 2007. Characterization of the novel human serotonin receptor subunits 5-HT3C, 5-HT3D, and 5-HT3E. *Mol Pharmacol.* 72:8-17.
- Pandhare, A., A.K. Hamouda, B. Staggs, S. Aggarwal, P.K. Duddempudi, J.R. Lever, D.J. Lapinsky, M. Jansen, J.B. Cohen, and M.P. Blanton. 2012. Bupropion binds to two sites in the Torpedo nicotinic acetylcholine receptor transmembrane domain: a photoaffinity labeling study with the bupropion analogue [(125)I]-SADU-3-72. *Biochemistry.* 51:2425-2435.
- Pandhare, A., A.S. Pappu, H. Wilms, M.P. Blanton, and M. Jansen. 2017. The antidepressant bupropion is a negative allosteric modulator of serotonin type 3A receptors. *Neuropharmacology.* 113:89-99.
- Parker, J.C., D. Sarkar, M.W. Quick, and R.A. Lester. 2003. Interactions of atropine with heterologously expressed and native alpha 3 subunit-containing nicotinic acetylcholine receptors. *Br J Pharmacol.* 138:801-810.
- Rajkumar, R., and R. Mahesh. 2010. The auspicious role of the 5-HT3 receptor in depression: a probable neuronal target? *J Psychopharmacol.* 24:455-469.
- Rammes, G., B. Eisensamer, U. Ferrari, M. Shapa, G. Gimpl, K. Gilling, C. Parsons, K. Riering, G. Hapfelmeier, B. Bondy, W. Zieglansberger, F. Holsboer, and R. Rupprecht. 2004. Antipsychotic drugs antagonize human serotonin type 3 receptor currents in a noncompetitive manner. *Mol Psychiatry.* 9:846-858, 818.
- Reeves, D.C., E.N. Goren, M.H. Akabas, and S.C. Lummis. 2001. Structural and electrostatic properties of the 5-HT3 receptor pore revealed by substituted cysteine accessibility mutagenesis. *J Biol Chem.* 276:42035-42042.
- Schroeder, D.H. 1983. Metabolism and kinetics of bupropion. *J Clin Psychiatry.* 44:79-81.
- Slemmer, J.E., B.R. Martin, and M.I. Damaj. 2000. Bupropion is a nicotinic antagonist. *J Pharmacol Exp Ther.* 295:321-327.
- Stahl, S.M., J.F. Pradko, B.R. Haight, J.G. Modell, C.B. Rockett, and S. Learned-Coughlin. 2004. A Review of the Neuropharmacology of Bupropion, a Dual Norepinephrine and Dopamine Reuptake Inhibitor. *Prim Care Companion J Clin Psychiatry.* 6:159-166.
- Thompson, A.J., and S.C. Lummis. 2007. The 5-HT3 receptor as a therapeutic target. *Expert Opin Ther Targets.* 11:527-540.
- Thompson, A.J., and S.C. Lummis. 2008. Antimalarial drugs inhibit human 5-HT(3) and GABA(A) but not GABA(C) receptors. *Br J Pharmacol.* 153:1686-1696.
- Thompson, A.J., and S.C. Lummis. 2013. Discriminating between 5-HT(3)A and 5-HT(3)AB receptors. *Br J Pharmacol.* 169:736-747.
- Tzvetkov, M.V., C. Meineke, E. Oetjen, K. Hirsch-Ernst, and J. Brockmoller. 2007. Tissue-specific alternative promoters of the serotonin receptor gene HTR3B in human brain and intestine. *Gene.* 386:52-62.
- Vazquez-Gomez, E., H.R. Arias, D. Feuerbach, M. Miranda-Morales, S. Mihailescu, K.M. Targowska-Duda, K. Jozwiak, and J. Garcia-Colunga. 2014. Bupropion-induced inhibition of alpha7 nicotinic acetylcholine receptors expressed in heterologous cells and neurons from dorsal raphe nucleus and hippocampus. *Eur J Pharmacol.* 740:103-111.
- Walstab, J., G. Rappold, and B. Niesler. 2010. 5-HT(3) receptors: role in disease and target of drugs. *Pharmacol Ther.* 128:146-169.
- Zwart, R., and H.P. Vijverberg. 1997. Potentiation and inhibition of neuronal nicotinic receptors by atropine: competitive and noncompetitive effects. *Mol Pharmacol.* 52:886-895.
